# Supplementary material for: Short-term Effects of Ambient Air Pollution on Emergency Department Visits for Asthma: An Assessment of Effect Modification by Prior Allergic Disease History
Source: PubMed Central journal article supplement — J Prev Med Public Health. 2016 Sep 8;49(5):329–41. doi: 10.3961/jpmph.16.038 (PMC5066424; doi:10.3961/jpmph.16.038), 2016-09-08
Supplement: jpmph-49-5-329-supple2.pdf [file jpmph-49-5-329-supple2.pdf]

**Supplemental Table 1.** Pearson correlation coefficients<sup>1</sup> between pollutants and meteorological variables, Korea, January 2005 to December 2009

|                               | <b>O<sub>3</sub></b> | <b>CO</b> | <b>NO<sub>2</sub></b> | <b>SO<sub>2</sub></b> | <b>PM<sub>10</sub></b> | <b>Temperature</b> | <b>Relative humidity</b> | <b>Vapor pressure</b> |
|-------------------------------|----------------------|-----------|-----------------------|-----------------------|------------------------|--------------------|--------------------------|-----------------------|
| O <sub>3</sub> (8-hr maximum) | 1                    |           |                       |                       |                        |                    |                          |                       |
| CO (daily mean)               | -0.41                | 1         |                       |                       |                        |                    |                          |                       |
| NO <sub>2</sub> (daily mean)  | -0.21                | 0.82      | 1                     |                       |                        |                    |                          |                       |
| SO <sub>2</sub> (daily mean)  | -0.24                | 0.79      | 0.71                  | 1                     |                        |                    |                          |                       |
| PM <sub>10</sub> (daily mean) | 0.05                 | 0.43      | 0.4                   | 0.43                  | 1                      |                    |                          |                       |
| Temperature                   | 0.56                 | -0.37     | -0.18                 | -0.43                 | -0.09                  | 1                  |                          |                       |
| Relative humidity             | -0.08                | -0.01     | -0.1                  | -0.17                 | -0.05                  | 0.41               | 1                        |                       |
| Vapor pressure                | 0.38                 | -0.36     | -0.29                 | -0.43                 | -0.14                  | 0.89               | 0.66                     | 1                     |

O<sub>3</sub>, ozone; CO, carbon monoxide; NO<sub>2</sub>, nitrogen dioxide; SO<sub>2</sub>, sulfur dioxide; PM<sub>10</sub>, particulate matter with an aerodynamic diameter < 10 μm.

<sup>1</sup>Correlation coefficients were significant ( $p < 0.001$ ), except for the correlation between relative humidity and CO.
